# Supplementary material for: Triazoles as a Potential Threat to the Nutritional Quality of Tomato Fruits
Source: MDPI journal article supplement (doi:10.3390/metabo13090988), 2023-09-01
Supplement: s1 [file s1]

# Supplement

## Triazoles as a potential threat to the nutrition quality of tomato fruits

Veronika Hýsková<sup>1</sup>, Michal Jakl<sup>2</sup>, Jana Jaklová Dytrtová<sup>3</sup>, Sanja Čavar Zeljković<sup>4,5</sup>, Ondřej Vrobel<sup>4,5</sup>, Kateřina Bělonožníková<sup>1</sup>, Daniel Kavan<sup>1</sup>, Tomáš Křížek<sup>6</sup>, Alice Šimonová<sup>6</sup>, Marie Vašková<sup>1</sup>, Ishak Kovač<sup>3</sup>, Antoniana Račko Žufić<sup>1</sup> and Helena Ryslavá<sup>1\*</sup>

<sup>1</sup> Faculty of Science, Department of Biochemistry, Charles University, Albertov 6, 128 00 Praha 2, Czech Republic; veronika.hyskova@natur.cuni.cz, katerina.belonoznikova@natur.cuni.cz, daniel.kavan@natur.cuni.cz, ouskovam@natur.cuni.cz, zuficnina@gmail.com, helena.ryslava@natur.cuni.cz

<sup>2</sup> Faculty of Agrobiological Sciences, Department of Agroenvironmental Chemistry and Plant Nutrition, Czech University of Life Sciences Prague, Kamýcká 129, 165 00 Praha - Suchbátka, Czech Republic; jakl@af.czu.cz

<sup>3</sup> Faculty of Physical Education and Sport, Sport Sciences—Biomedical Department, Charles University, Josefovská 269, 162 52 Praha 6, Czech Republic; dytrtova@ftvs.cuni.cz, ikovac@ftvs.cuni.cz

<sup>4</sup> Centre of the Region Haná for Biotechnological and Agricultural Research, Department of Genetic Resources for Vegetables, Medicinal and Special Plants, Crop Research Institute, Šlechtitelů 241/27, 783 71 Olomouc - Holice, Czech Republic; sanja.cavar@upol.cz, ondrej.vrobel@upol.cz

<sup>5</sup> Czech Advanced Technology and Research Institute, Palacký University, Křížkovského 511/8, 779 00 Olomouc, Czech Republic; sanja.cavar@upol.cz, ondrej.vrobel@upol.cz

<sup>6</sup> Faculty of Science, Department of Analytical Chemistry, Charles University, Albertov 6, 128 00 Praha 2, Czech Republic; tomas.krizek@natur.cuni.cz, alice.simonova@natur.cuni.cz

\* Correspondence: helena.ryslava@natur.cuni.cz; Tel.: +420 221 951 282

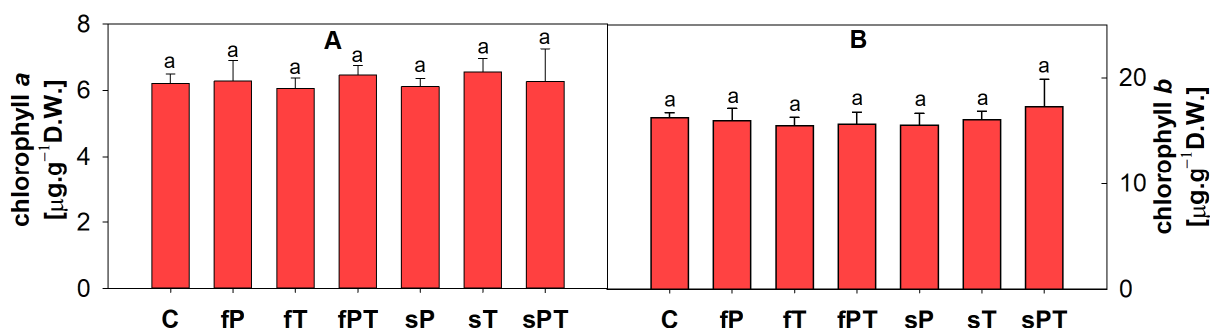

**Figure S1.** Contents of chlorophyll a (A) and chlorophyll b (B). Different letters above each bar denote significant differences ( $p \leq 0.05$ ) between plant groups according to a one-way analysis of variance (ANOVA; Holm-Sidak test). The same letters above a bar indicate that no significant differences were found between groups. Each column bar represents the mean  $\pm$  SD. Abbreviations: D.W., dry weight.

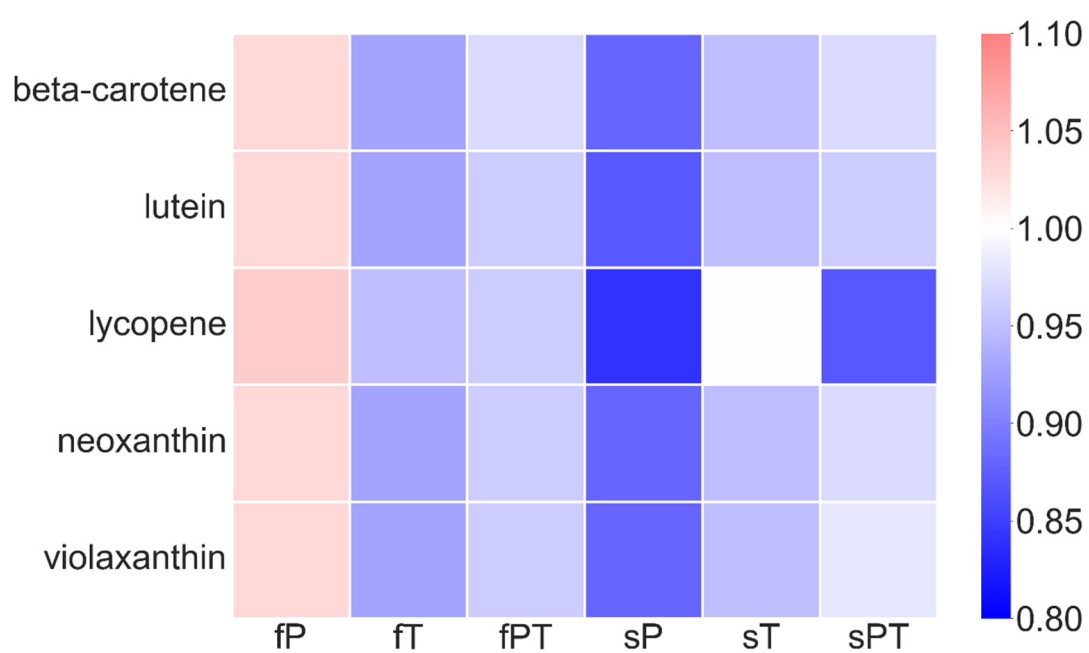

**Figure S2.** Contents of  $\beta$ -carotene (absorbance at 449 nm), lutein (444 nm), lycopene (502 nm), neoxanthin (436 nm), and violaxanthin (438 nm) in comparison with the control group without any triazole-application.

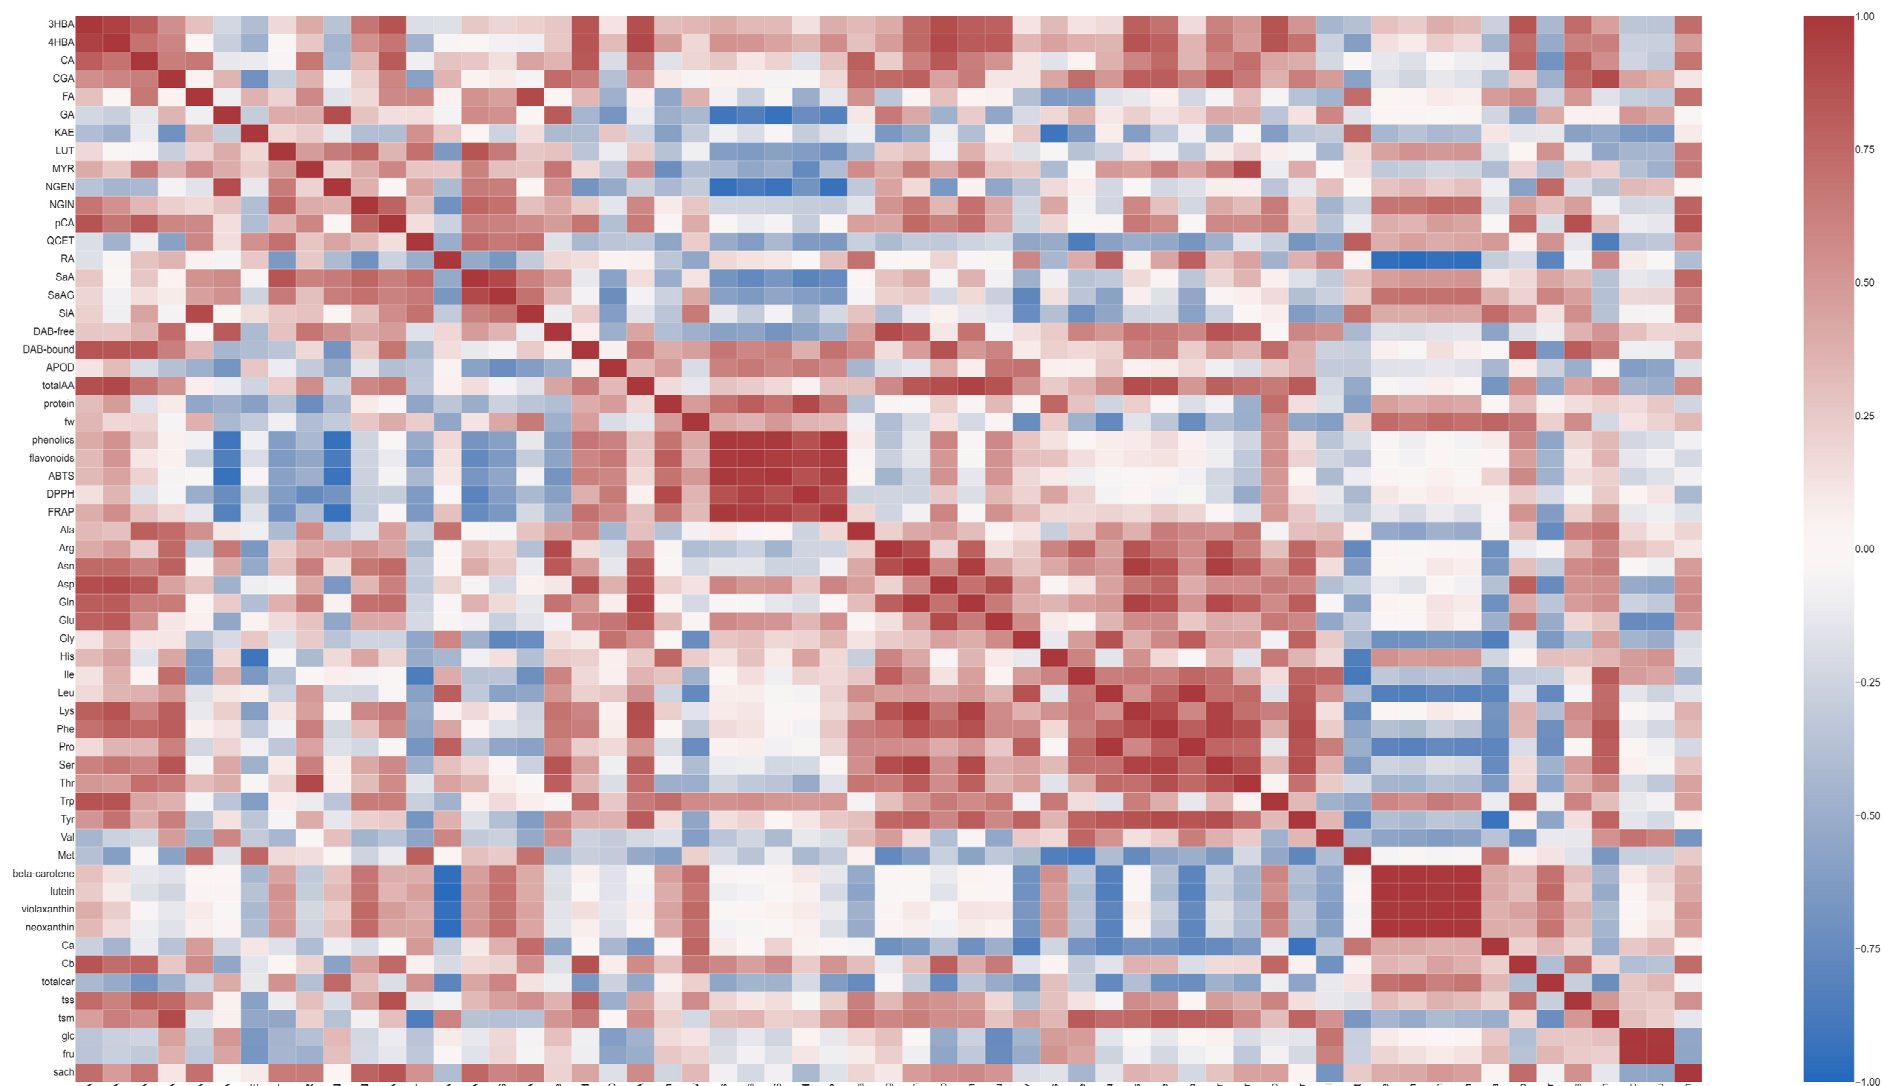

**Figure S3.** Heatmap showing Pearson's correlation coefficients among all measurements in the triazole treated groups. Abbreviations: 3HBA, 3-hydroxybenzoic acid; 4HBA, 4-hydroxybenzoic acid; CA, caffeic acid; CGA, chlorogenic acid; FA, ferulic acid; GA, gallic acid; KAE, kaempferol; LUT, luteolin; MYR, myricetin; NGEN, naringenin; NGIN,

naringin; pCA, *p*-coumaric acid; QCET, quercetin, RA, rosmarinic acid; SaA, salicylic acid, SaAG, salicylic acid 2-O- $\beta$ -D-glucoside, SiA, syringic acid; DAB-free, total soluble peroxidases; DAB-bound, total membrane-bound peroxidases; APOD, ascorbate peroxidase; total AA, total amino acid content; protein, total protein content; fw, fresh weight; phenolics, total phenolic content; flavonoids, total flavonoid content; ABTS, antioxidant capacity measured by ABTS method; DPPH, antioxidant capacity measured by DPPH method; FRAP, antioxidant capacity measured by FRAP method; Ca, chlorophyll a; Cb chlorophyll b; totalcar, total carotenoids; tss, total soluble saccharides; tsm, total membrane-bound saccharides; glc, glucose; fru, fructose; sach, saccharose.
